# Supplementary material
Source: MDPI journal article supplement (https://www.mdpi.com/2079-9292/12/11/2531)
Supplement: s1 [file s1]

**Table S1:** Comparison of the proposed rehabilitation gloves with those mentioned in previous literature.

|                                             | Component                                                                                   | Function                                                                                                              |
|---------------------------------------------|---------------------------------------------------------------------------------------------|-----------------------------------------------------------------------------------------------------------------------|
| <b>Y Zhu et al.[1]</b>                      | Flexible gloves composed of bending brake, rotating brake, bending sensor, and force sensor | Improve grip ability                                                                                                  |
| <b>X Chen et al.[2]</b>                     | Sensory gloves (force and bending sensors), sports gloves (tendon driven)                   | Mirror therapy and task oriented therapy, sports gloves only support flexion movements                                |
| <b>Y Chen et al.[3]</b>                     | Tendon driven flexible gloves                                                               | Improve grip ability                                                                                                  |
| <b>P Ben-Tzvi et al.[4]</b>                 | Cable driven robot tactile exoskeleton device                                               | Measure finger and thumb movements to assist in hand grasping movements                                               |
| <b>J Yi et al.[5]</b>                       | Flexible gloves driven by cables                                                            | Assist in hand bending and stretching, achieving full range of finger movement                                        |
| <b>Our Personalized and Safe Soft Glove</b> | Flexible gloves composed of bending sensors, pressure sensors, and pneumatic actuators      | Evaluate hand bending threshold to achieve multimodal bending and stretching movements of fingers within a safe range |

## Reference

1. Zhu, Y.; Gong, W.; Chu, K.; Wang, X.; Hu, Z.; Su, H.J.S. A Novel Wearable Soft Glove for Hand Rehabilitation and Assistive Grasping. *Sensors* **2022**, *22*, 6294. doi:10.3390/s22166294.
2. Chen, X.; Gong, L.; Wei, L.; Yeh, S.-C.; Da Xu, L.; Zheng, L.; Zou, Z.J.I.T.o.I.I. A wearable hand rehabilitation system with soft gloves. *IEEE Transactions on Industrial Informatics* **2020**, *17*, 943-952. doi:10.1109/TII.2020.3010369.
3. Chen, Y.; Tan, X.; Yan, D.; Zhang, Z.; Gong, Y.J.I.j.o.t.e.i.h.; medicine. A composite fabric-based soft rehabilitation glove with soft joint for dementia in Parkinson's disease. *IEEE journal of translational engineering in health and medicine* **2020**, *8*, 1-10. doi:10.1109/JTEHM.2020.2981926.
4. Ben-Tzvi, P.; Ma, Z.J.I.T.o.N.S.; Engineering, R. Sensing and force-feedback exoskeleton (SAFE) robotic glove. *IEEE Transactions on Neural Systems and Rehabilitation Engineering* **2014**, *23*, 992-1002. doi:10.1109/TNSRE.2014.2378171.
5. Yi, J.; Chen, X.; Wang, Z.J.I.R.; Letters, A. A three-dimensional-printed soft robotic glove with enhanced ergonomics and force capability. *IEEE Robotics and Automation Letters* **2017**, *3*, 242-248. doi:10.1109/LRA.2017.2737481.

**Table S2:** Implementation of different states in a single branch.

| <b>Pneumatic circuit<br/>status</b> | <b>Pneumatic<br/>actuator<br/>deformation</b> | <b>two-position<br/>two-way solenoid<br/>valve</b> | <b>two-position<br/>three-way<br/>solenoid valve</b> | <b>Inflatable pump</b> | <b>Exhaust pump</b> |
|-------------------------------------|-----------------------------------------------|----------------------------------------------------|------------------------------------------------------|------------------------|---------------------|
| Inflatable status                   | Expansion                                     | 0 *                                                | 0                                                    | 0                      | 1                   |
| Keeping in shape                    | Stationary                                    | 1 *                                                | 0                                                    | 0                      | 1                   |
| Exhaust status                      | Systolic                                      | 1                                                  | 1                                                    | 0                      | 0                   |

\* 0: Power on  
\* 1: Power failure

**Table S3.** 13 gestures in three modes, adapted from[20].

| Rehabilitation Training Model | Gestures                                                                            |               | Brief description                                                     |
|-------------------------------|-------------------------------------------------------------------------------------|---------------|-----------------------------------------------------------------------|
| fine training                 |    | FT            | flex thumb                                                            |
|                               |    | FI            | flex index finger                                                     |
|                               |    | FM            | flex middle finger                                                    |
|                               |    | FR            | flex ring finger                                                      |
|                               |    | FL            | flex little finger                                                    |
| functional training           |    | CH            | close hand                                                            |
|                               |    | FTI           | flex thumb and index finger                                           |
|                               |   | FTM           | flex thumb and middle finger                                          |
|                               |  | FTR           | flex thumb and ring finger                                            |
|                               |  | FTL           | flex thumb and little finger                                          |
| Gesture training              |  | OK            | flex thumb and index finger,<br>extend middle, ring and little finger |
|                               |  | VICTOR        | flex thumb,ring and little finger,<br>extend index and middle finger  |
|                               |  | Orchid finger | flex thumb and middle finger,<br>extend index, ring and little finger |

**Table S4.** Characteristics of subjects.

| Index                              | Patients                                      |
|------------------------------------|-----------------------------------------------|
| Number                             | 8                                             |
| Age (min/max)                      | 63/68                                         |
| Disease type                       | Stroke/Parkinson's disease/traumatic fracture |
| The average age of illness (years) | 9±0.77                                        |

**Table S5:** Bending sensor calibration results.

| Bending<br>angle (°) | Resistivity (kΩ) |       |       |      |      |
|----------------------|------------------|-------|-------|------|------|
|                      | 01               | 02    | 03    | 04   | 05   |
| 0                    | 7.2              | 7.3   | 7.3   | 7.5  | 7.4  |
| 10                   | 7.8              | 8     | 7.9   | 8.1  | 7.9  |
| 20                   | 8.2              | 8.3   | 8.1   | 8.4  | 8.3  |
| 30                   | 9                | 9.2   | 9     | 9.3  | 9.15 |
| 40                   | 9.5              | 9.6   | 9.55  | 9.7  | 9.65 |
| 50                   | 10.3             | 10.3  | 10.35 | 10.5 | 10.5 |
| 60                   | 11               | 11.15 | 11.2  | 11.3 | 11.3 |
| 70                   | 11.45            | 11.5  | 11.5  | 11.6 | 11.8 |
| 80                   | 12.25            | 12.5  | 12.4  | 12.6 | 12.7 |
| 90                   | 12.95            | 13    | 13.2  | 13.1 | 13.3 |

**Table S6:** Bending angle and its corresponding air pressure change in different states of the actuator.

| Actuator Status          |                    | Thumb  | Index  | Middle | Ring   | Little |
|--------------------------|--------------------|--------|--------|--------|--------|--------|
| Natural status           | bending angle (°)  | 41.46  | 39.26  | 40.69  | 39.90  | 39.89  |
| Maximum extension status | bending angle (°)  | 15.65  | 15.34  | 16.78  | 15.59  | 16.73  |
|                          | air pressure (kPa) | -31.41 | -29.43 | -29.48 | -29.48 | -29.83 |
| Maximum flexion status   | bending angle (°)  | 85.97  | 89.53  | 94.27  | 88.82  | 88.65  |
|                          | air pressure (kPa) | 103.92 | 109.52 | 115.41 | 108.68 | 107.97 |

**Table S7:** The relationship between air pressure and bending angle during the extension movement of the actuator.

|               |                    |         |         |         |         |         |
|---------------|--------------------|---------|---------|---------|---------|---------|
| <b>Thumb</b>  | air pressure (kPa) | -31.406 | -20.98  | -15.582 | -11.07  | -6.123  |
|               | bending angle (°)  | 15.654  | 19.6865 | 21.3785 | 26.9035 | 31.4085 |
| <b>Index</b>  | air pressure (kPa) | -29.425 | -19.885 | -14.568 | -10.378 | -6.27   |
|               | bending angle (°)  | 15.3405 | 17.913  | 19.8515 | 24.884  | 31.9435 |
| <b>Middle</b> | air pressure (kPa) | -29.473 | -20.53  | -15.212 | -11.184 | -6.511  |
|               | bending angle (°)  | 16.775  | 19.712  | 22.843  | 25.11   | 33.9845 |
| <b>Ring</b>   | air pressure (kPa) | -29.473 | -20.61  | -15.535 | -10.942 | -6.914  |
|               | bending angle (°)  | 15.594  | 19.4245 | 22.8075 | 25.921  | 30.5815 |
| <b>Little</b> | air pressure (kPa) | -29.828 | -20.288 | -14.729 | -10.862 | -6.672  |
|               | bending angle (°)  | 16.731  | 18.0245 | 21.883  | 24.916  | 31.0915 |

**Table S8:** The relationship between air pressure and bending angle during the flexion movement of the actuator.

|               |                    |         |          |          |          |          |          |
|---------------|--------------------|---------|----------|----------|----------|----------|----------|
| <b>Thumb</b>  | air pressure (kPa) | -0.952  | 20.076   | 40.62    | 60.278   | 80.823   | 100.481  |
|               | bending angle (°)  | 41.4555 | 63.979   | 74.616   | 80.155   | 83.8895  | 84.753   |
| <b>Index</b>  | air pressure (kPa) | 0.579   | 21.768   | 39.573   | 60.52    | 79.534   | 100.078  |
|               | bending angle (°)  | 39.2605 | 64.761   | 75.034   | 81.1745  | 84.832   | 87.721   |
| <b>Middle</b> | air pressure (kPa) | 0.176   | 20.881   | 41.587   | 61.487   | 80.42    | 100.642  |
|               | bending angle (°)  | 40.685  | 61.7125  | 76.1115  | 82       | 84.074   | 88.074   |
| <b>Ring</b>   | air pressure (kPa) | 0.176   | 20.881   | 39.412   | 59.875   | 80.178   | 99.917   |
|               | bending angle (°)  | 39.9025 | 60.90188 | 76.16161 | 81.95885 | 84.78124 | 86.11664 |
| <b>Little</b> | air pressure (kPa) | 0.176   | 21.204   | 39.009   | 59.956   | 80.581   | 100.32   |
|               | bending angle (°)  | 39.883  | 63.7235  | 74.546   | 81.349   | 84.803   | 86.2665  |



**Table S9:** Subject's movement thresholds in the rehabilitation training experiment.

|                                | <b>Thumb</b> | <b>Index</b> | <b>Middle</b> | <b>Ring</b> | <b>Little</b> |
|--------------------------------|--------------|--------------|---------------|-------------|---------------|
| Minimum movement threshold (°) | 7.83         | 17.83        | 22.36         | 14.21       | 5.33          |
| Maximum movement threshold (°) | 68.54        | 79.45        | 93.96         | 87.27       | 86.18         |

**Table S10:** Movement thresholds for randomly selected subject in safety assessment experiment.

|                                | <b>Thumb</b> | <b>Index</b> | <b>Middle</b> | <b>Ring</b> | <b>Little</b> |
|--------------------------------|--------------|--------------|---------------|-------------|---------------|
| Minimum movement threshold (°) | 11.159       | 13.037       | 20.929        | 23.481      | 6.048         |
| Maximum movement threshold (°) | 53.578       | 71.491       | 90.934        | 55.253      | 79.962        |

**Table S11:** Minimum movement threshold of each finger during 6 sessions of “CH”.

| Experiment No. | Thumb angle (°) | Index angle (°) | Middle angle (°) | Ring angle (°) | Little angle (°) |
|----------------|-----------------|-----------------|------------------|----------------|------------------|
| 1              | 13.044          | 15.702          | 23.636           | 25.394         | 8.86             |
| 2              | 12.466          | 15.374          | 22.965           | 25.131         | 8.638            |
| 3              | 12.273          | 14.557          | 21.764           | 24.604         | 7.756            |
| 4              | 12.658          | 15.374          | 23.233           | 24.867         | 9.23             |
| 5              | 12.562          | 14.883          | 22.965           | 24.604         | 8.49             |
| 6              | 12.755          | 15.21           | 23.233           | 24.736         | 8.343            |

**Table S12:** Maximum movement threshold of each finger during 6 sessions of “CH”.

| Experiment No. | Thumb angle (°) | Index angle (°) | Middle angle (°) | Ring angle (°) | Little angle (°) |
|----------------|-----------------|-----------------|------------------|----------------|------------------|
| 1              | 51.284          | 68.838          | 89.334           | 53.857         | 80.549           |
| 2              | 52.809          | 74.279          | 89.334           | 54.619         | 79.436           |
| 3              | 50.779          | 71.849          | 88.967           | 54.314         | 78.057           |
| 4              | 49.899          | 70.587          | 88.783           | 53.857         | 75.21            |
| 5              | 47.784          | 66.621          | 88.783           | 53.857         | 75.747           |
| 6              | 52.809          | 73.379          | 88.783           | 53.857         | 76.829           |

**Table S13:** Consistency analysis of the actual minimum movement threshold and the target minimum movement threshold of the five fingers.

|               | <b>Thumb</b>    | <b>Index</b>    | <b>Middle</b>  | <b>Ring</b>     | <b>Little</b>   |
|---------------|-----------------|-----------------|----------------|-----------------|-----------------|
| Average value | -1.467          | -2.146          | -1.704         | -1.408          | -2.505          |
| SD            | 0.263           | 0.406           | 0.928          | 0.316           | 0.499           |
| 95% CI        | -1.983 – -0.951 | -2.942 – -1.350 | -3.522 – 0.114 | -2.028 – -0.789 | -3.482 – -1.528 |

**Table S14:** Consistency analysis of the actual maximum movement thresholds of the five fingers and the target maximum movement thresholds.

|               | <b>Thumb</b>   | <b>Index</b>   | <b>Middle</b> | <b>Ring</b>   | <b>Little</b>  |
|---------------|----------------|----------------|---------------|---------------|----------------|
| Average value | 2.684          | 0.566          | 1.937         | 1.193         | 2.324          |
| SD            | 1.906          | 2.868          | 0.270         | 0.329         | 2.098          |
| 95% CI        | -1.051 – 6.419 | -5.055 – 6.186 | 1.407 – 2.467 | 0.548 – 1.838 | -1.788 – 6.436 |

**Table S15:** Technical specifications of the glove.

| Index                        |                       |                                                                                                                                                               |
|------------------------------|-----------------------|---------------------------------------------------------------------------------------------------------------------------------------------------------------|
| Sensors                      | Weight                | 128 g                                                                                                                                                         |
|                              | Type                  | Bending sensor and air pressure sensor                                                                                                                        |
|                              | Quantity (each)       | 5 bending sensors and 5 air pressure sensors                                                                                                                  |
|                              | sensitivity           | The resistance tolerance of the bending sensor is $\pm 30\%$ , and the accuracy of the pressure sensor module is $\pm 1\%$                                    |
| Processor                    | Type                  | ARM Cortex M3 processor                                                                                                                                       |
|                              | Frequency             | 72 MHz                                                                                                                                                        |
|                              | Power supply          | 12 V, 11200 mA lithium battery combined with AMS1117 series voltage regulator chip                                                                            |
| Function and characteristics | Support gesture types | Fine training (“FT”, “FI”, “FM”, “FR”, “FL”), functional training (“CH”, “FTI”, “FTM”, “FTR”, “FTL”), hand gesture training (“OK”, “VICTOR”, “Orchid finger”) |
|                              | Real-time feedback    | Bending feedback control                                                                                                                                      |
|                              | Software application  | Human machine interaction interface in LABVIEW environment                                                                                                    |

**Figure S1:** Bending sensors conditioning circuit.

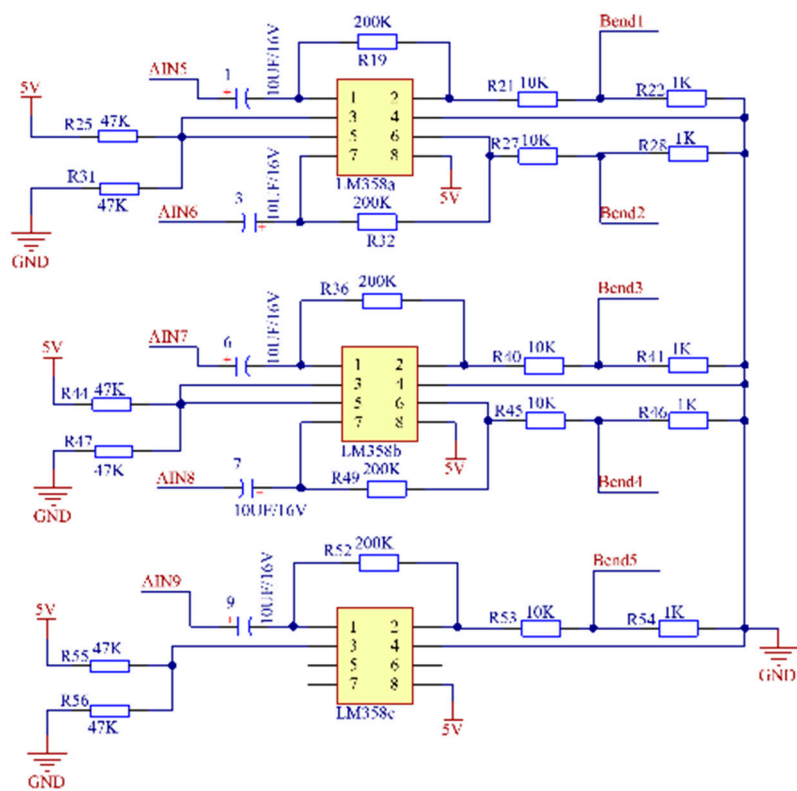





**Figure S3:** The process of rehabilitation training control.

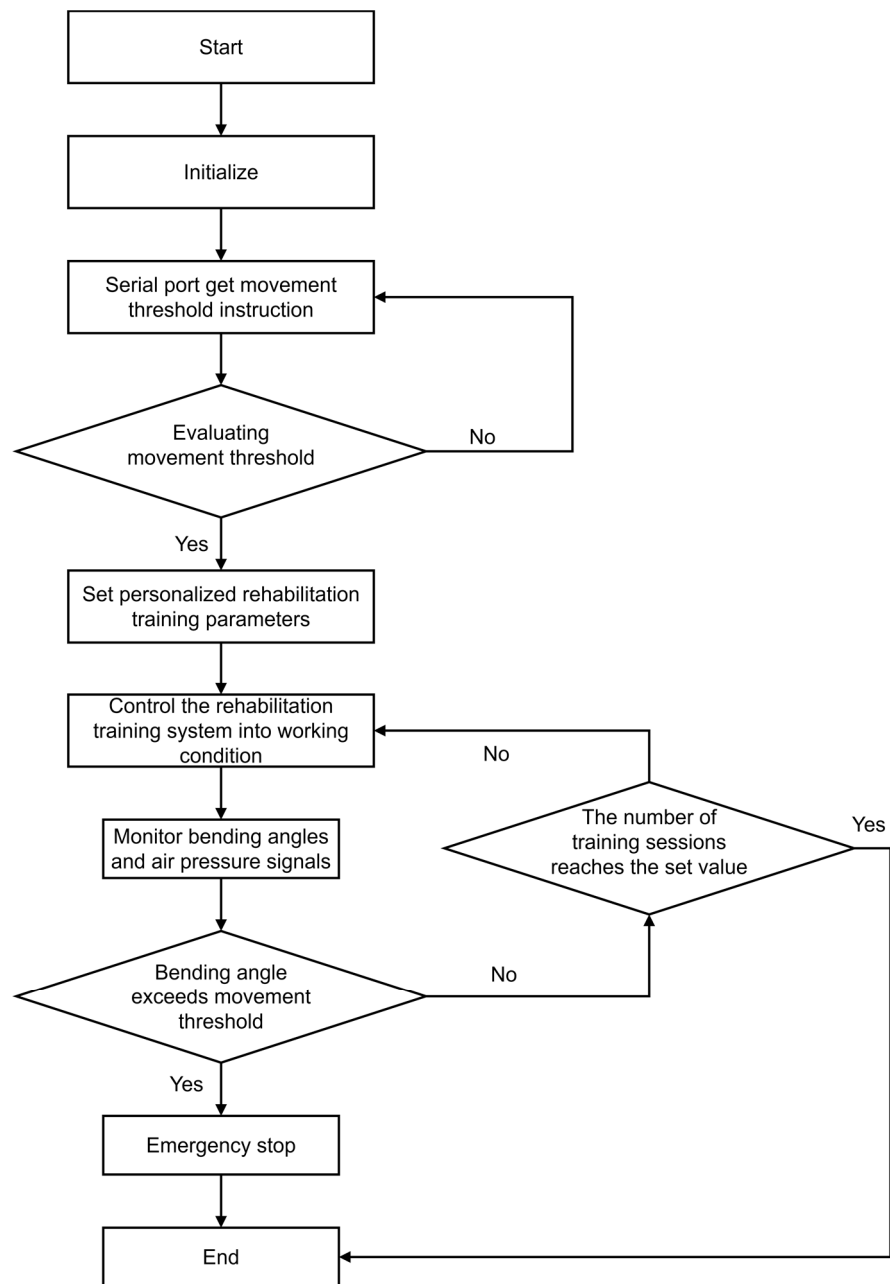

**Figure S4:** The effect of "fine training" and the change of bending angle of five fingers. (a) "FT"; (b) "FI"; (c) "FM"; (d) "FR".

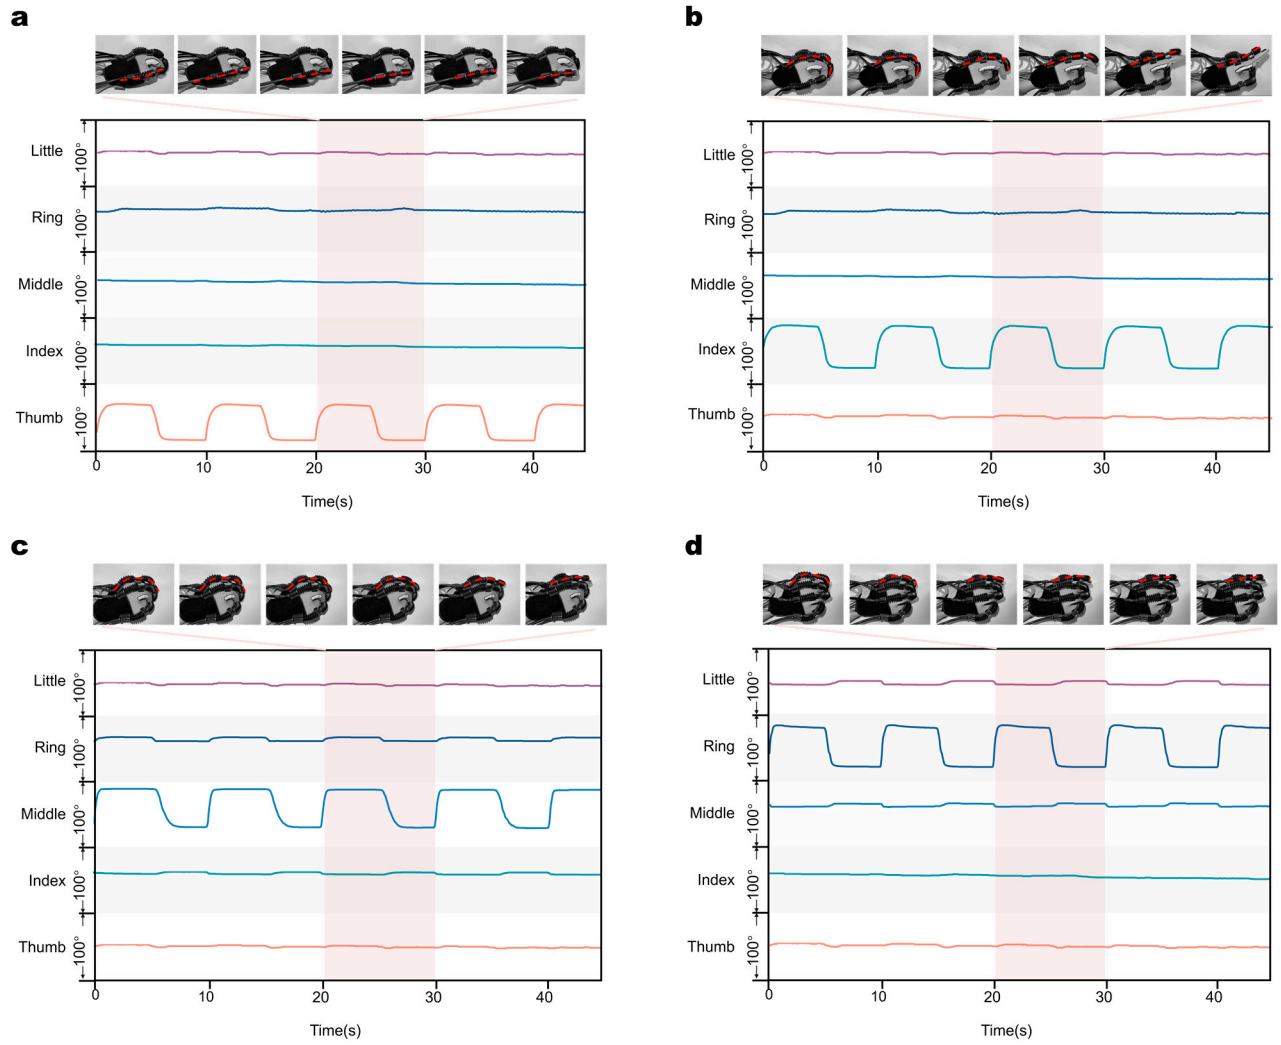

**Figure S5:** The effect of "functional training" and the change of bending angle of five fingers. (a) "CH"; (b) "FTI"; (c) "FTM"; (d) "FTL".

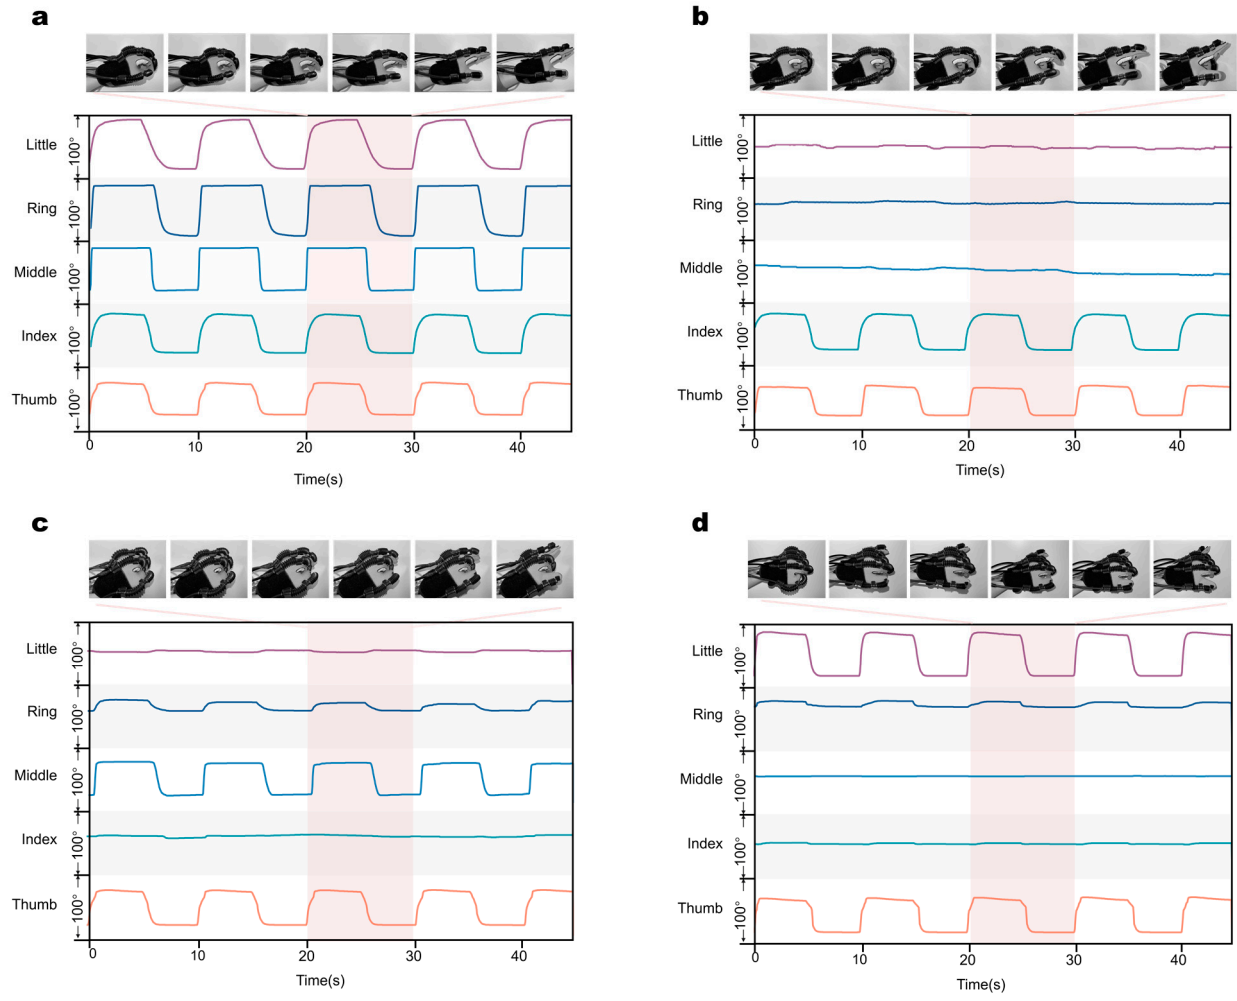

**Figure S6:** The effect of "hand gesture training" and the change of bending angle of five fingers. (a) "OK"; (b) "Orchid finger".

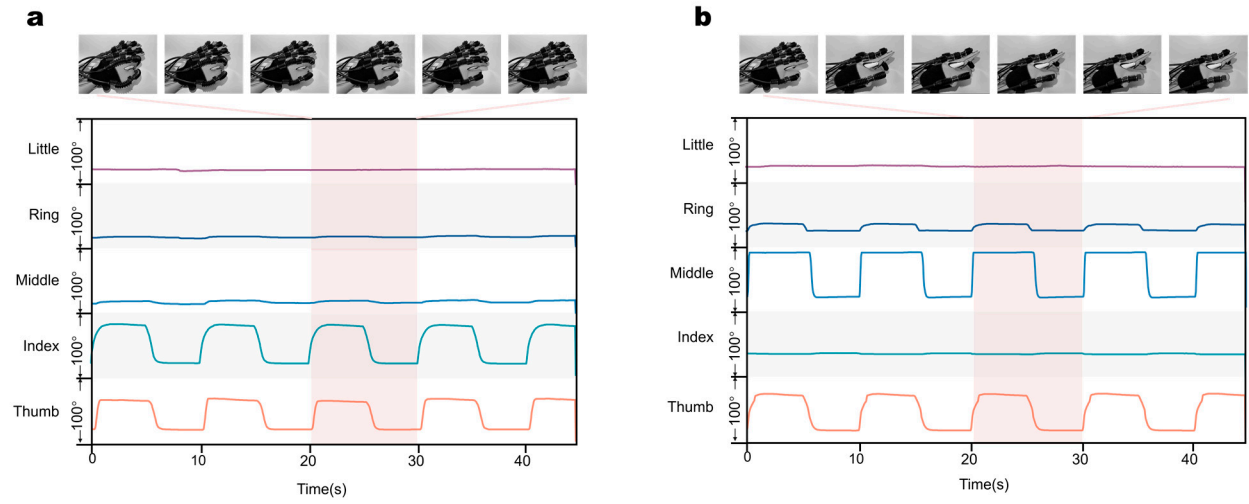

**Figure S7:** The five-training box line figure for system security assessment.

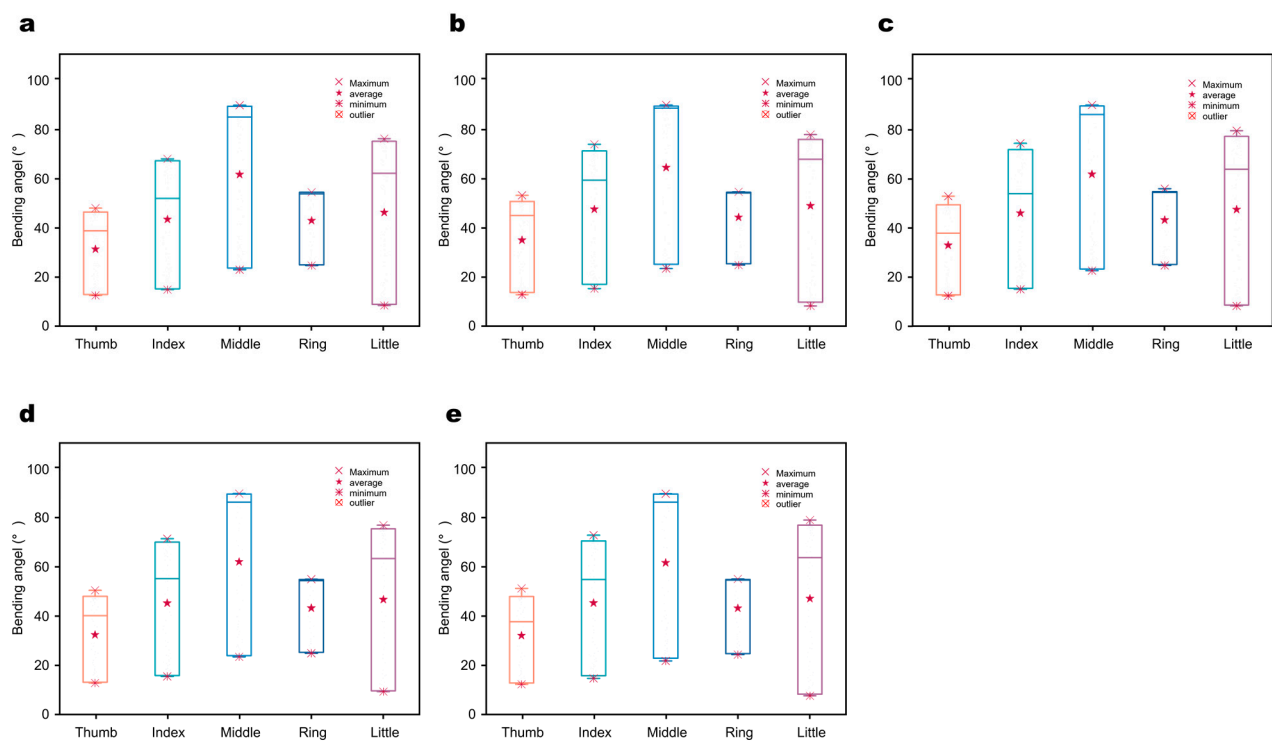

**Figure S8:** Flexible rehabilitation gloves physical picture.

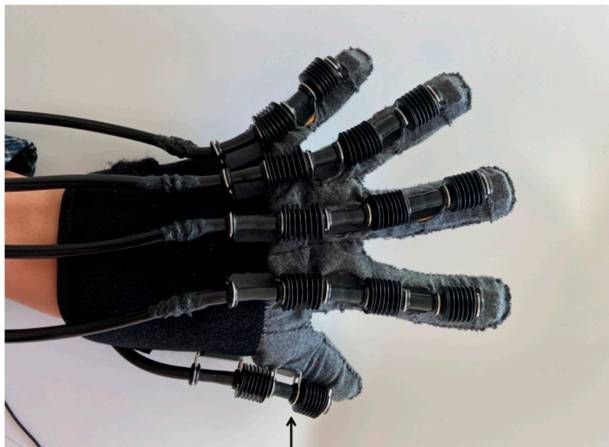

outer glove

soft pneumatic actuator

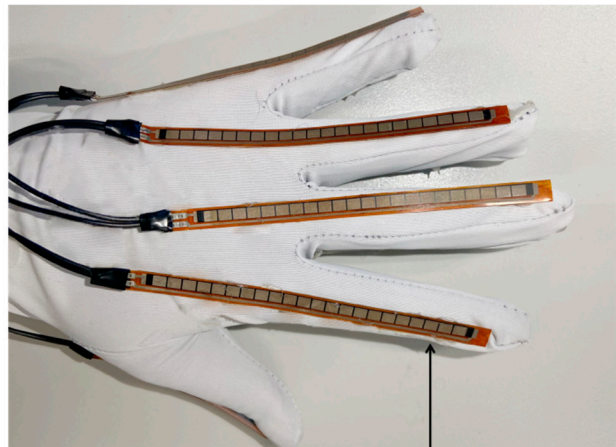

inner glove

bending sensor
